# Supplementary material
Source: PubMed Central journal article supplement (PMC10992426)
Supplement: 262_2021_2878_MOESM1_ESM.pdf [file 262_2021_2878_MOESM1_ESM.pdf]

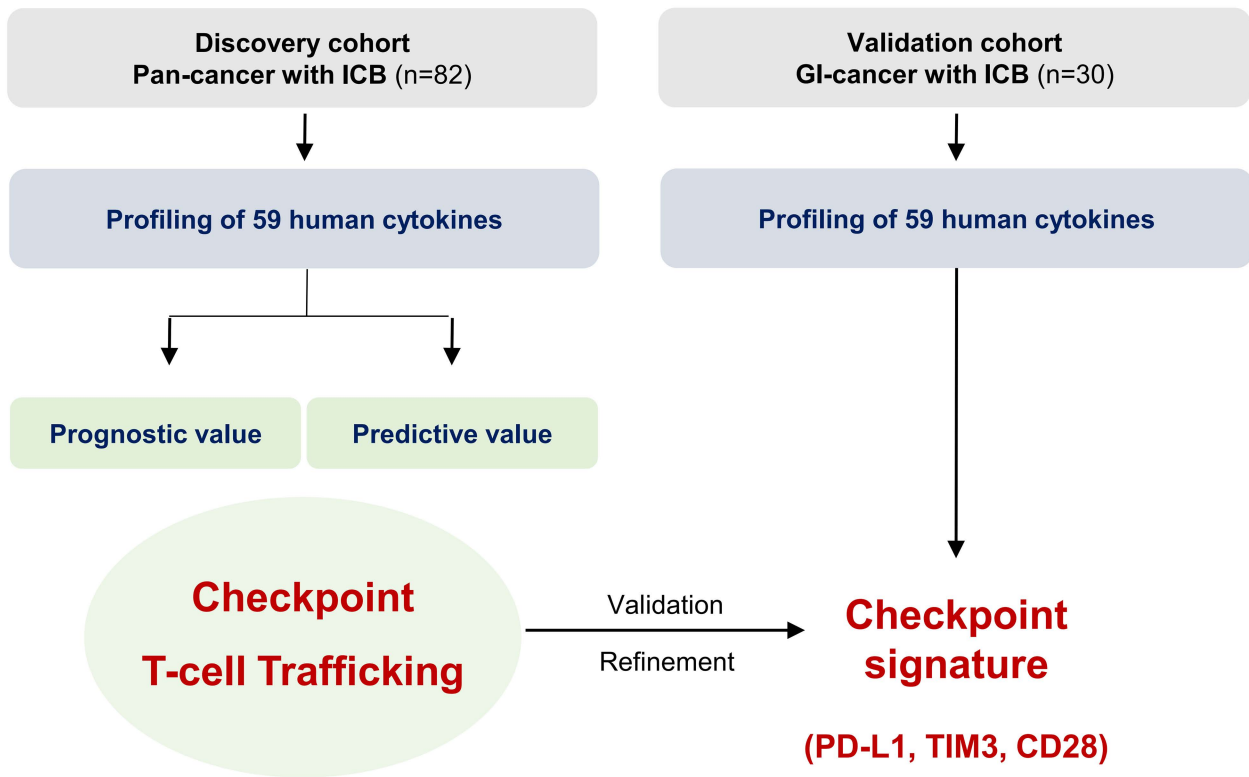

**Figure S1.**

**Figure S1.** Diagram of analysis.

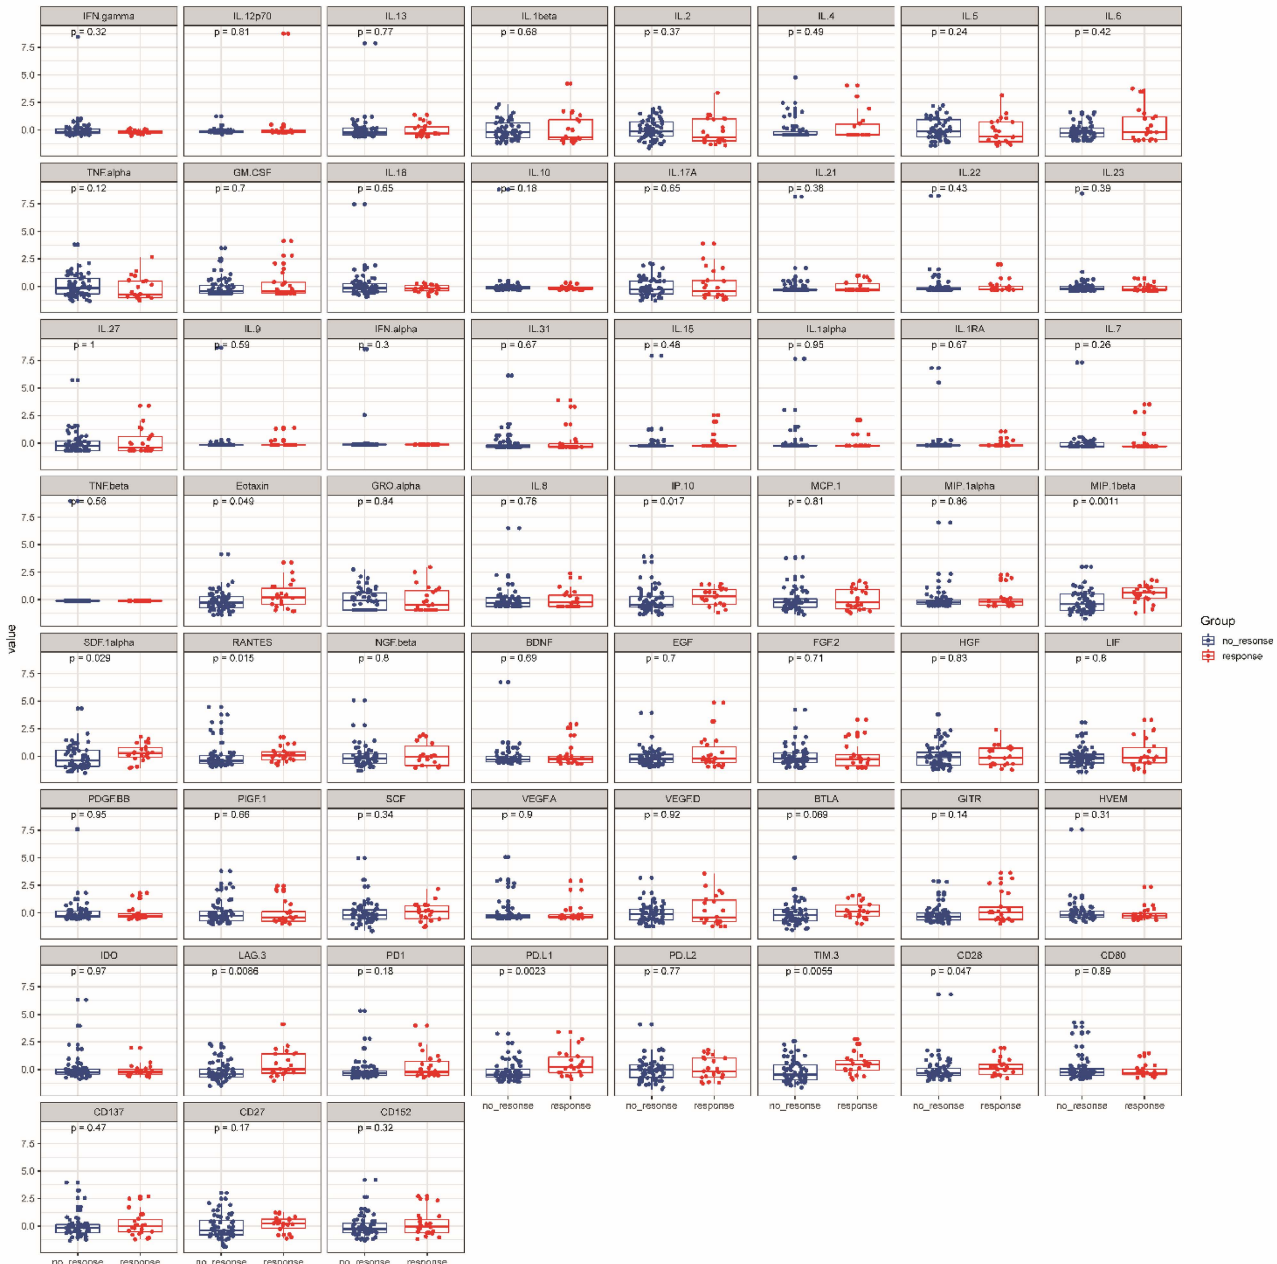

**Figure S2.**

**Figure S2.** The expression levels (standardized z-scores) of serological cytokines in the discovery cohort.

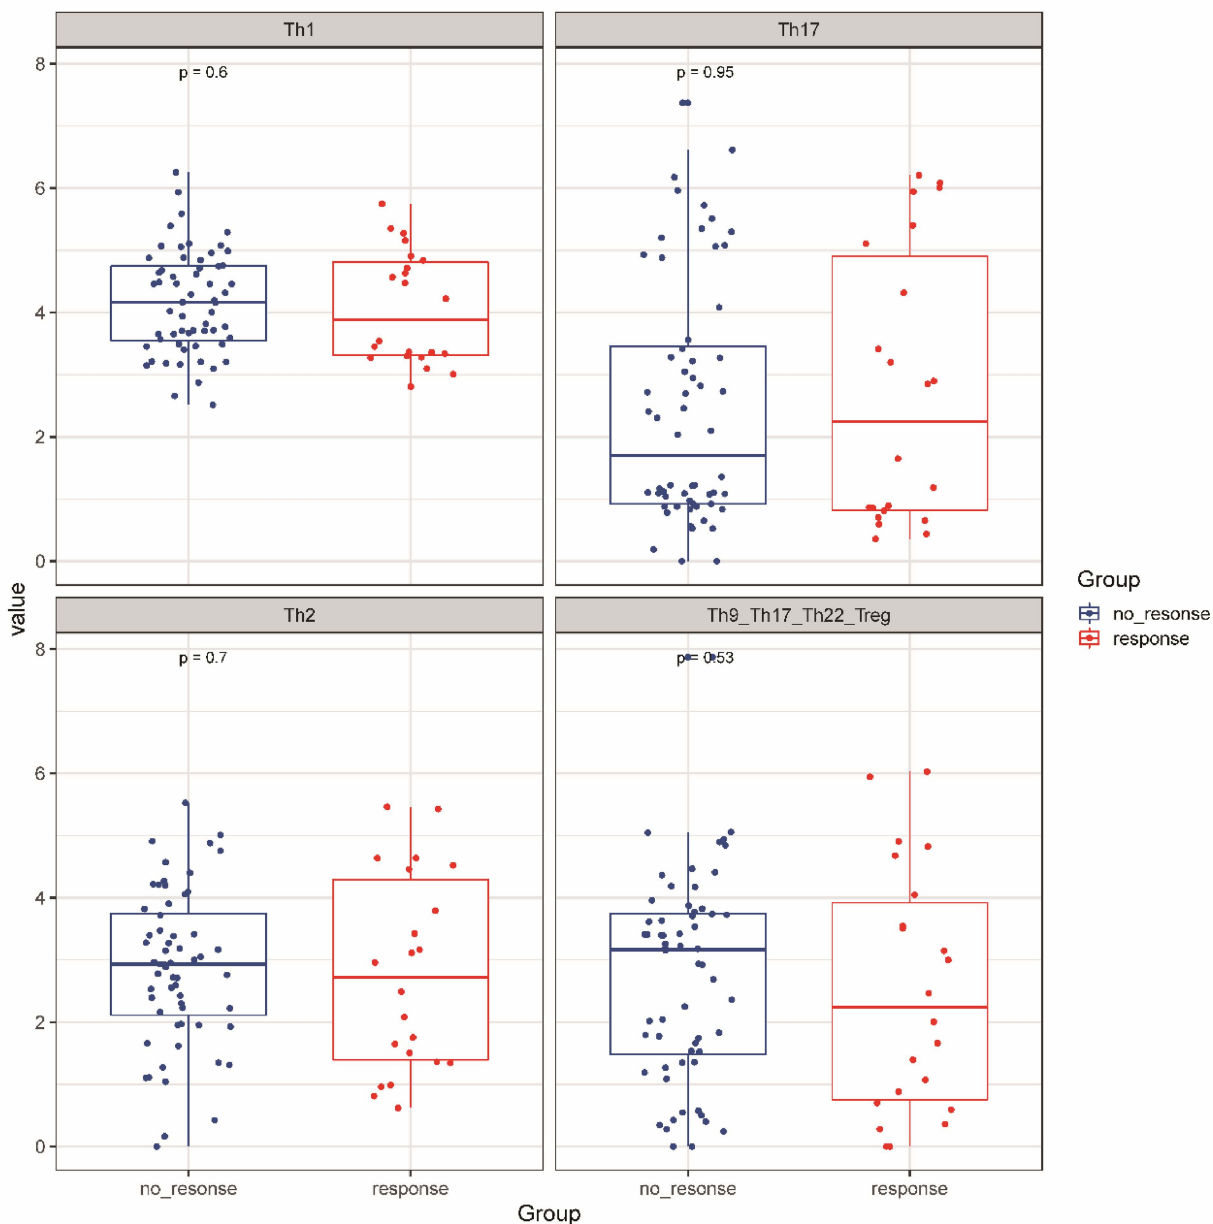

**Figure S3.**

**Figure S3.** The expression levels of serological signatures (Th1, Th2, Th17 and Th9/Th17/Th22/Treg cytokines) in the discovery cohort.

**A.**

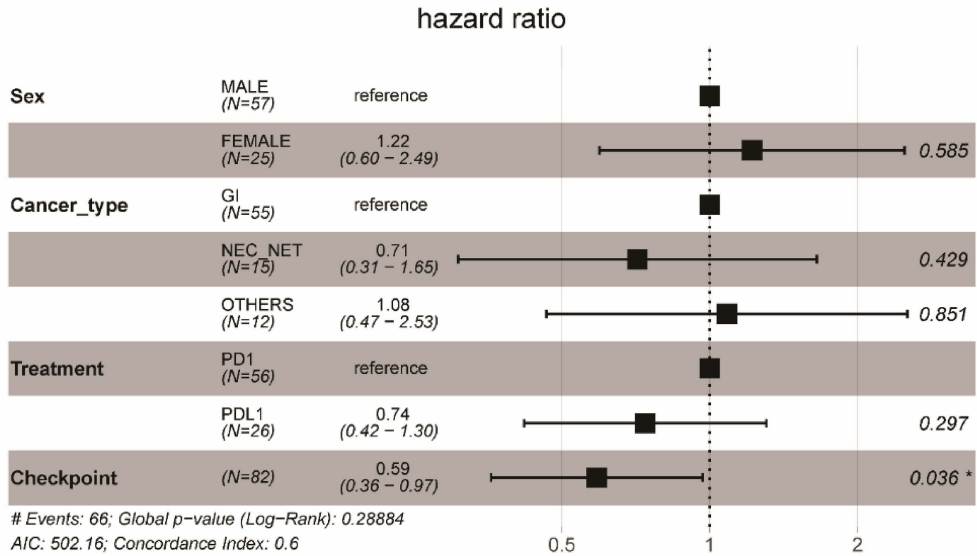

**B.**

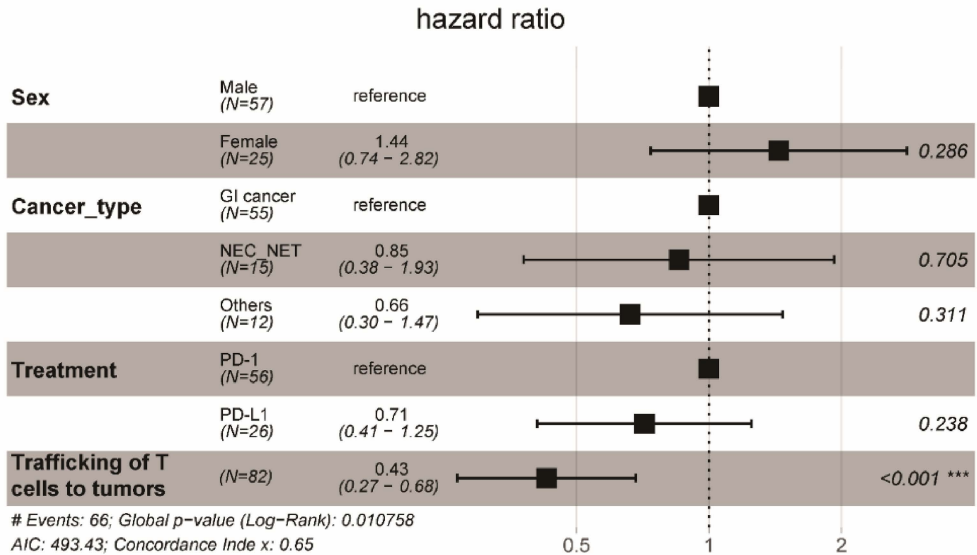

**Figure S4**

**Figure S4.** Survival analysis of cytokine signatures in the discovery cohort.

**A.**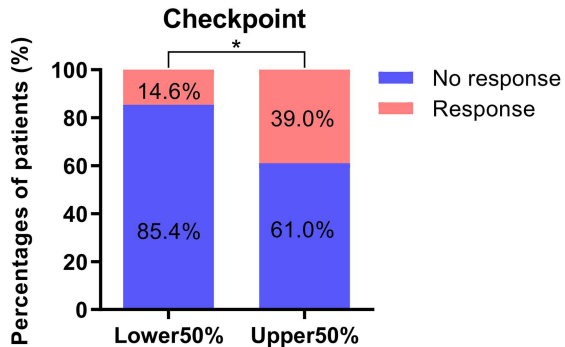**B.**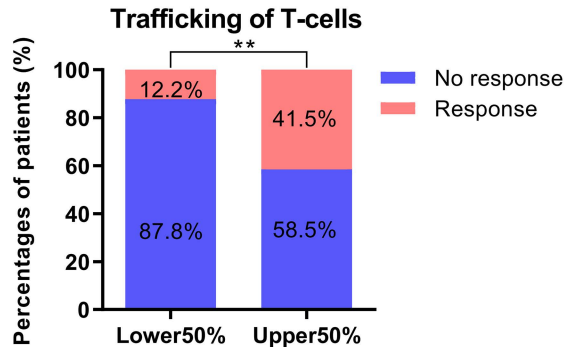**Figure S5**

**Figure S5. Higher signature levels correlated with increased response rate in the discovery cohort.** A,B. Response rates (CR/PR) in higher versus lower checkpoint signature (A) or trafficking of T-cells signature (B). Median value of each signature was used as the cut point.

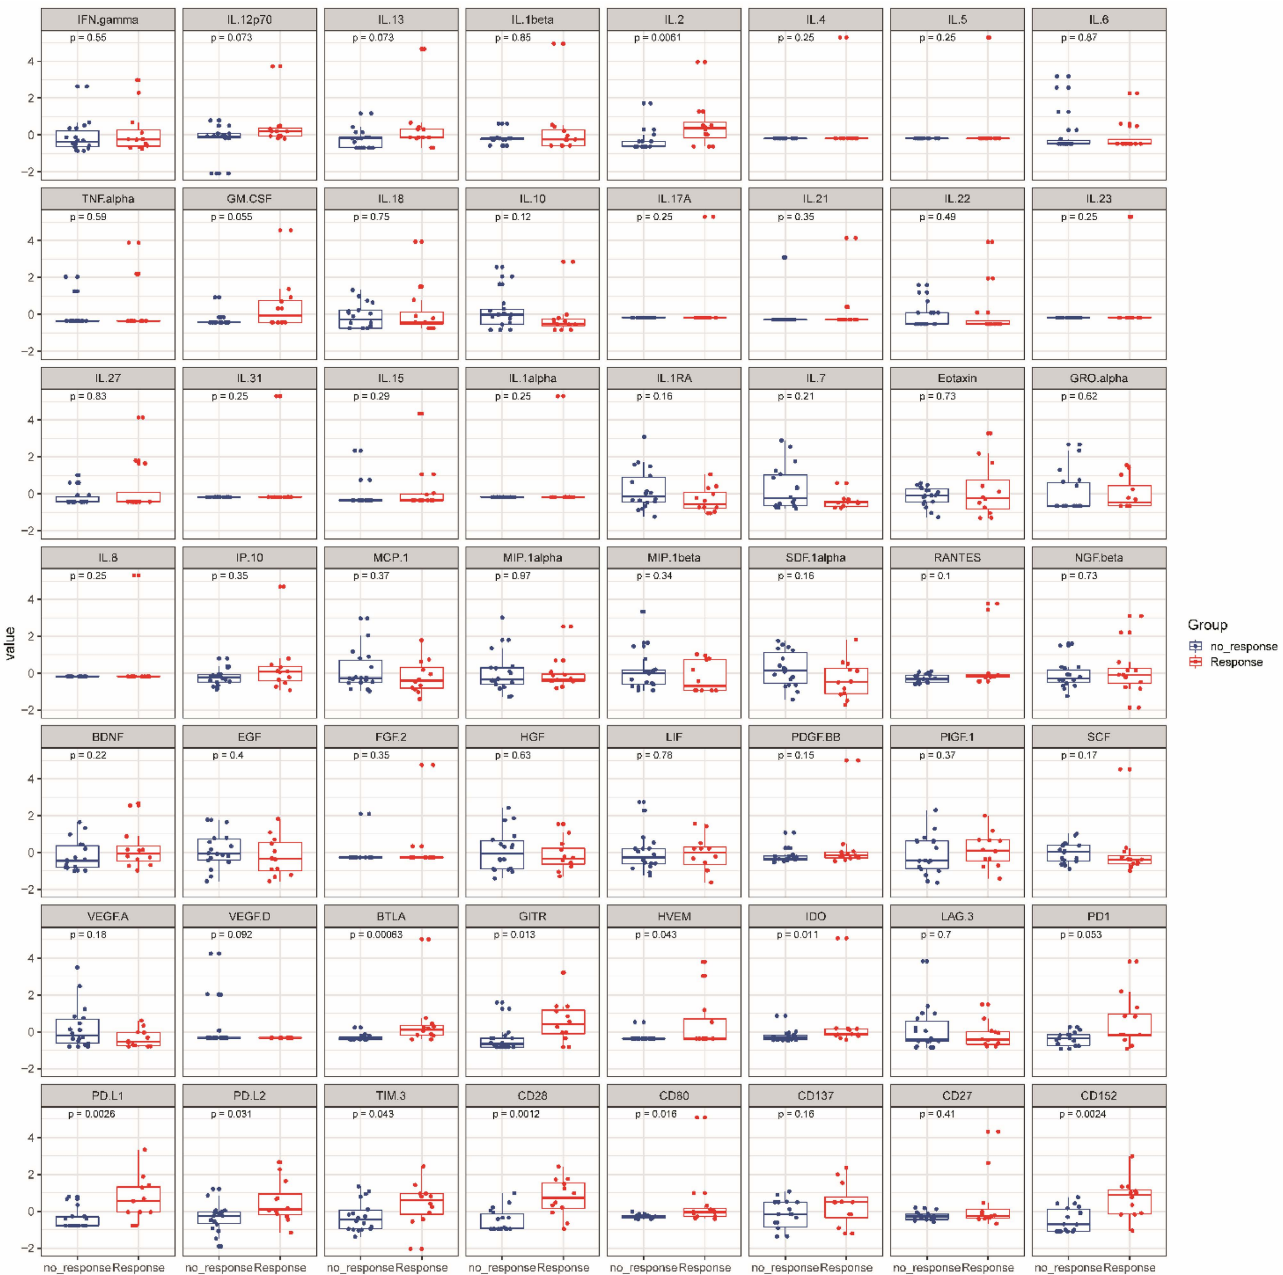

**Figure S6.**

**Figure S6.** The expression levels (standardized z-scores) of serological cytokines in the validation cohort.

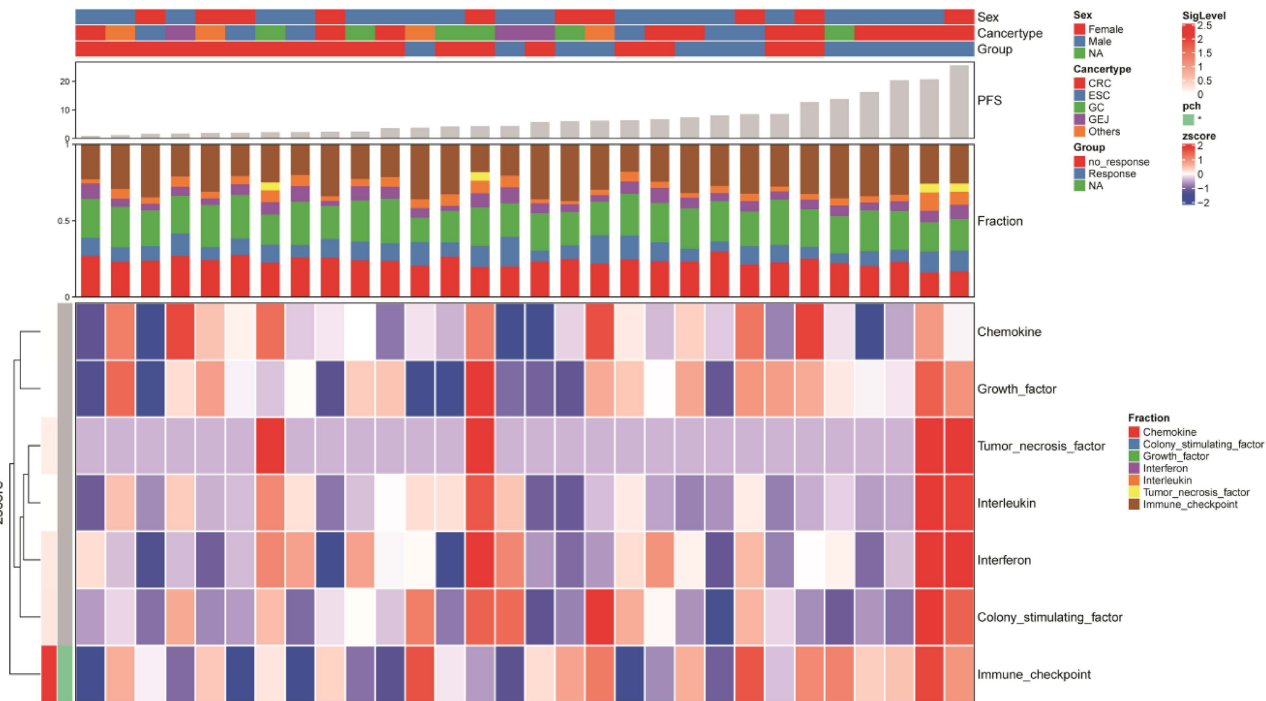

**Figure S7**

**Figure S7.** Classification and exploration of cytokine clusters in the validation cohort.

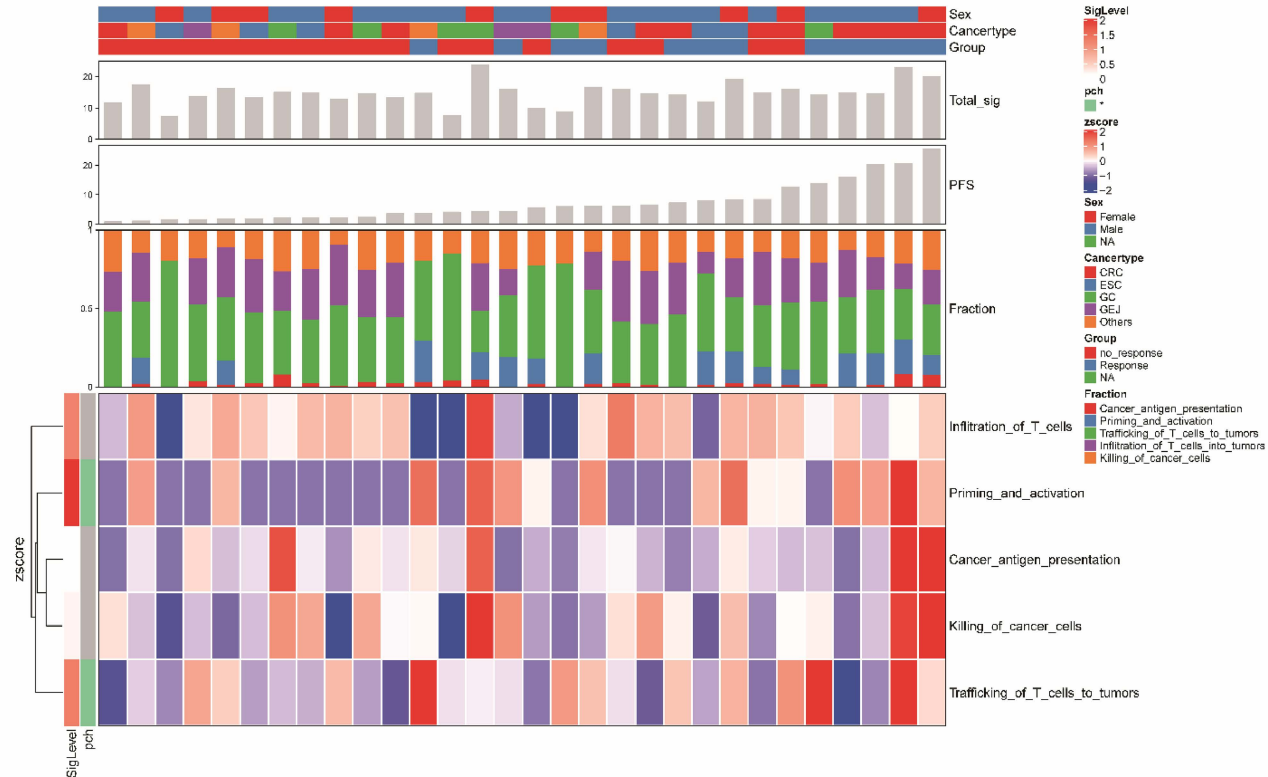

**Figure S8**

**Figure S8.** Functional characterization of cytokine signatures in the validation cohort.
