# Supplementary material
Source: PubMed Central journal article supplement (PMC10992426)
Supplement: 262_2021_2878_MOESM2_ESM.pdf [file 262_2021_2878_MOESM2_ESM.pdf]

Cytokine clusters (biological classification)

| Name       | chemokine | colony stimulating factor | growth factor | interferon | interleukin | tumor necrosis factor | Checkpoint |
|------------|-----------|---------------------------|---------------|------------|-------------|-----------------------|------------|
| BDNF       |           |                           | TRUE          |            |             |                       |            |
| EGF        |           |                           | TRUE          |            |             |                       |            |
| Eotaxin    | TRUE      |                           |               |            |             |                       |            |
| FGF-2      |           |                           | TRUE          |            |             |                       |            |
| GM-CSF     |           | TRUE                      |               |            |             |                       |            |
| GRO-alpha  | TRUE      |                           |               |            |             |                       |            |
| HGF        |           |                           | TRUE          |            |             |                       |            |
| IFN-alpha  |           |                           |               | TRUE       |             |                       |            |
| IFN-gamma  |           |                           |               | TRUE       |             |                       |            |
| IL-10      |           |                           |               |            | TRUE        |                       |            |
| IL-12p70   |           |                           |               |            | TRUE        |                       |            |
| IL-13      |           |                           |               |            | TRUE        |                       |            |
| IL-15      |           |                           |               |            | TRUE        |                       |            |
| IL-17A     |           |                           |               |            | TRUE        |                       |            |
| IL-18      |           |                           |               |            | TRUE        |                       |            |
| IL-1alpha  |           |                           |               |            | TRUE        |                       |            |
| IL-1beta   |           |                           |               |            | TRUE        |                       |            |
| IL-1RA     |           |                           |               |            | TRUE        |                       |            |
| IL-2       |           |                           |               |            | TRUE        |                       |            |
| IL-21      |           |                           |               |            | TRUE        |                       |            |
| IL-22      |           |                           |               |            | TRUE        |                       |            |
| IL-23      |           |                           |               |            | TRUE        |                       |            |
| IL-27      |           |                           |               |            | TRUE        |                       |            |
| IL-31      |           |                           |               |            | TRUE        |                       |            |
| IL-4       |           |                           |               |            | TRUE        |                       |            |
| IL-5       |           |                           |               |            | TRUE        |                       |            |
| IL-6       |           |                           |               |            | TRUE        |                       |            |
| IL-7       |           |                           |               |            | TRUE        |                       |            |
| IL-8       | TRUE      |                           |               |            | TRUE        |                       |            |
| IL-9       |           |                           |               |            | TRUE        |                       |            |
| IP-10      | TRUE      |                           |               |            |             |                       |            |
| LIF        |           |                           | TRUE          |            |             |                       |            |
| MCP-1      | TRUE      |                           |               |            |             |                       |            |
| MIP-1alpha | TRUE      |                           |               |            |             |                       |            |
| MIP-1beta  | TRUE      |                           |               |            |             |                       |            |
| NGF-beta   |           |                           | TRUE          |            |             |                       |            |
| PDGF-BB    |           |                           | TRUE          |            |             |                       |            |
| PIGF-1     |           |                           | TRUE          |            |             |                       |            |
| RANTES     | TRUE      |                           |               |            |             |                       |            |
| SCF        |           | TRUE                      |               |            |             |                       |            |
| SDF-1alpha | TRUE      |                           |               |            |             |                       |            |
| TNF-alpha  |           |                           |               |            |             | TRUE                  |            |
| TNF-beta   |           |                           |               |            |             | TRUE                  |            |
| VEGF-A     |           |                           | TRUE          |            |             |                       |            |

|        |  |  |      |  |  |  |      |
|--------|--|--|------|--|--|--|------|
| VEGF-D |  |  | TRUE |  |  |  |      |
| BTLA   |  |  |      |  |  |  | TRUE |
| IDO    |  |  |      |  |  |  | TRUE |
| LAG-3  |  |  |      |  |  |  | TRUE |
| PD1    |  |  |      |  |  |  | TRUE |
| PD-L1  |  |  |      |  |  |  | TRUE |
| PD-L2  |  |  |      |  |  |  | TRUE |
| TIM-3  |  |  |      |  |  |  | TRUE |
| CD152  |  |  |      |  |  |  | TRUE |
| GITR   |  |  |      |  |  |  | TRUE |
| HVEM   |  |  |      |  |  |  | TRUE |
| CD28   |  |  |      |  |  |  | TRUE |
| CD80   |  |  |      |  |  |  | TRUE |
| CD137  |  |  |      |  |  |  | TRUE |
| CD27   |  |  |      |  |  |  | TRUE |

| Functional characterization (related to the immunity cycle) |                        |                                  |                                     |                         | T helper (Th) cells related cytokine subclasses |      |      |                    |
|-------------------------------------------------------------|------------------------|----------------------------------|-------------------------------------|-------------------------|-------------------------------------------------|------|------|--------------------|
| Cancer antigen presentation                                 | Priming and activation | Trafficking of T cells to tumors | Infiltration of T cells into tumors | Killing of cancer cells | Th1                                             | Th17 | Th2  | Th9/Th17/Th22/Treg |
|                                                             |                        |                                  |                                     |                         |                                                 |      |      |                    |
|                                                             |                        |                                  |                                     |                         |                                                 |      |      |                    |
|                                                             |                        |                                  |                                     |                         |                                                 |      |      |                    |
|                                                             |                        |                                  |                                     |                         | TRUE                                            |      |      |                    |
|                                                             |                        |                                  |                                     |                         |                                                 |      |      |                    |
|                                                             |                        |                                  |                                     |                         |                                                 |      |      |                    |
| TRUE                                                        |                        |                                  |                                     |                         |                                                 |      |      |                    |
|                                                             |                        |                                  |                                     | TRUE                    | TRUE                                            |      |      |                    |
| TRUE                                                        |                        |                                  |                                     |                         |                                                 |      | TRUE | TRUE               |
|                                                             |                        |                                  |                                     |                         | TRUE                                            |      |      |                    |
|                                                             |                        |                                  |                                     |                         |                                                 |      | TRUE |                    |
|                                                             |                        |                                  |                                     |                         |                                                 | TRUE |      |                    |
|                                                             |                        |                                  |                                     |                         | TRUE                                            |      |      |                    |
| TRUE                                                        |                        |                                  |                                     |                         |                                                 |      | TRUE |                    |
|                                                             | TRUE                   |                                  |                                     |                         | TRUE                                            |      |      |                    |
|                                                             |                        |                                  |                                     |                         |                                                 | TRUE |      |                    |
|                                                             |                        |                                  |                                     |                         |                                                 | TRUE |      |                    |
|                                                             |                        |                                  |                                     |                         |                                                 |      |      | TRUE               |
|                                                             |                        |                                  |                                     |                         |                                                 |      |      | TRUE               |
|                                                             |                        |                                  |                                     |                         |                                                 |      | TRUE |                    |
| TRUE                                                        |                        |                                  |                                     |                         |                                                 |      | TRUE |                    |
|                                                             |                        |                                  |                                     |                         |                                                 |      | TRUE |                    |
|                                                             |                        |                                  |                                     |                         |                                                 |      | TRUE |                    |
|                                                             |                        |                                  |                                     |                         |                                                 |      |      |                    |
|                                                             |                        |                                  |                                     |                         |                                                 |      |      | TRUE               |
|                                                             |                        | TRUE                             |                                     |                         |                                                 |      |      |                    |
|                                                             |                        |                                  |                                     |                         |                                                 |      |      |                    |
|                                                             |                        |                                  |                                     |                         |                                                 |      |      |                    |
|                                                             |                        |                                  |                                     |                         |                                                 |      |      |                    |
|                                                             |                        |                                  |                                     |                         |                                                 |      |      |                    |
|                                                             |                        |                                  |                                     |                         |                                                 |      |      |                    |
|                                                             |                        |                                  |                                     |                         |                                                 |      |      |                    |
|                                                             |                        |                                  |                                     |                         |                                                 |      |      |                    |
|                                                             |                        |                                  |                                     |                         |                                                 |      |      |                    |
|                                                             |                        |                                  |                                     |                         |                                                 |      |      |                    |
| TRUE                                                        |                        |                                  |                                     |                         | TRUE                                            |      |      |                    |
|                                                             |                        |                                  |                                     |                         |                                                 |      |      |                    |
|                                                             |                        |                                  | TRUE                                |                         |                                                 |      |      |                    |
